# Supplementary material
Source: publisher figshare collection journal article supplement (https://acs.figshare.com/ndownloader/files/5467037)
Supplement: Supplementary file 1 [file 5467037]

## Supporting Information

# Converting Light Energy to Chemical Energy: A New Catalytic Approach for Sustainable Environmental Remediation

*Michelle A. Nguyen,<sup>1</sup> Elsayed M. Zahran,<sup>1§</sup> Azaan S. Wilbon,<sup>1</sup> Alexander V. Besmer,<sup>1</sup> Vincent J. Cendan,<sup>1</sup> William A. Ranson,<sup>1</sup> Randy L. Lawrence,<sup>1</sup> Joshua L. Cohn,<sup>2</sup> Leonidas G. Bachas,<sup>1</sup> and Marc R. Knecht<sup>1,\*</sup>*

<sup>1</sup>Department of Chemistry, University of Miami, 1301 Memorial Drive, Coral Gables, Florida 33146, United States

<sup>2</sup>Department of Physics, University of Miami, 1320 Campo Sano Avenue, Coral Gables, Florida 33146, United States

<sup>§</sup>On academic leave from the Department of Applied Organic Chemistry, National Research Centre, Egypt

\*To whom correspondence should be addressed: MK: phone – (305) 284-9351 and email - knecht@miami.edu

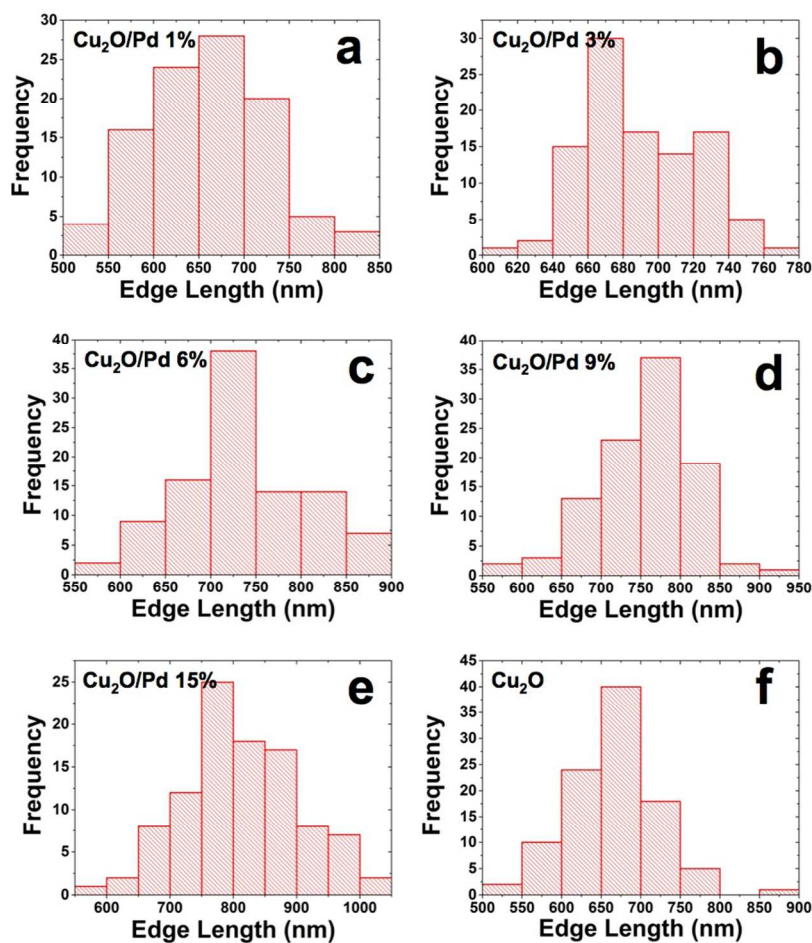

**Figure S1.** Size analysis of the  $\text{Cu}_2\text{O}/\text{Pd}$  materials with a Pd mass of (a) 1%, (b) 3%, (c) 6%, (d) 9%, and (e) 15%. Panel (f) presents the size analysis of the bare  $\text{Cu}_2\text{O}$  cubes.

**Table S1. ICP-OES Analysis for the Cu<sub>2</sub>O/Pd Materials**

|                               | <b>Pd wt%</b> |
|-------------------------------|---------------|
| <b>Cu<sub>2</sub>O/Pd 1%</b>  | 0.92          |
| <b>Cu<sub>2</sub>O/Pd 3%</b>  | 2.35          |
| <b>Cu<sub>2</sub>O/Pd 6%</b>  | 5.65          |
| <b>Cu<sub>2</sub>O/Pd 9%</b>  | 7.62          |
| <b>Cu<sub>2</sub>O/Pd 15%</b> | 14.99         |

**Table S2. Pseudo-first-order rate constants for the PCB photodechlorination reactions for each of the Cu<sub>2</sub>O/Pd materials indicated at a catalyst loading of 2 mg/mL**

|                               | $k_{\text{PCB 1}}$<br>(10 <sup>-3</sup> h <sup>-1</sup> ) | $k_{\text{PCB 2}}$<br>(10 <sup>-3</sup> h <sup>-1</sup> ) | $k_{\text{PCB 3}}$<br>(10 <sup>-3</sup> h <sup>-1</sup> ) |
|-------------------------------|-----------------------------------------------------------|-----------------------------------------------------------|-----------------------------------------------------------|
| <b>Cu<sub>2</sub>O/Pd 1%</b>  | 2.4 ± 0.7                                                 | 2.3 ± 0.5                                                 | 7.7 ± 0.7                                                 |
| <b>Cu<sub>2</sub>O/Pd 3%</b>  | 3.4 ± 0.5                                                 | 2.7 ± 0.1                                                 | 6.3 ± 0.3                                                 |
| <b>Cu<sub>2</sub>O/Pd 6%</b>  | 2.5 ± 0.2                                                 | 4.0 ± 0.2                                                 | 7.7 ± 0.3                                                 |
| <b>Cu<sub>2</sub>O/Pd 9%</b>  | 1.9 ± 0.1                                                 | 11.0 ± 0.7                                                | 50.8 ± 2.9                                                |
| <b>Cu<sub>2</sub>O/Pd 15%</b> | 2.4 ± 0.2                                                 | 6.3 ± 0.3                                                 | 36.5 ± 1.3                                                |

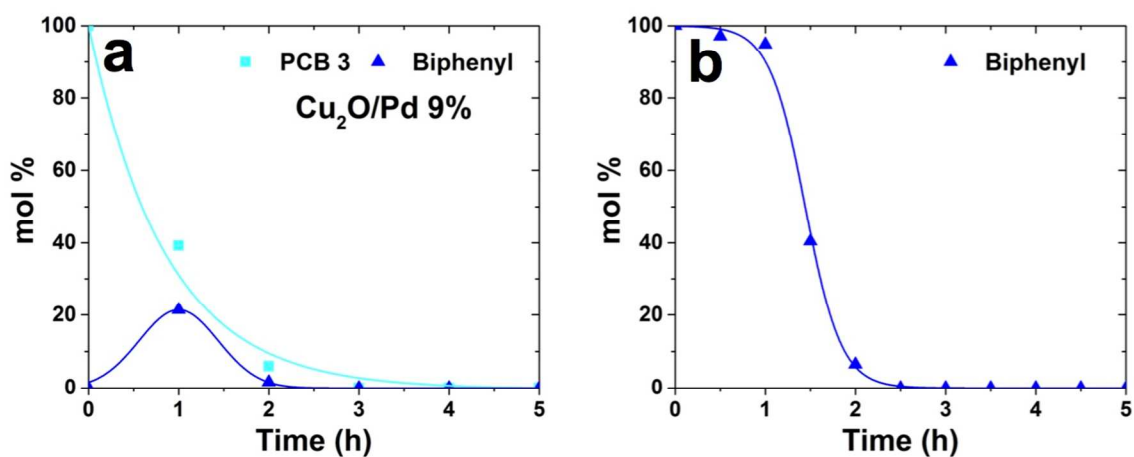

**Figure S2.** The overall reaction analysis for (a) the dechlorination of PCB 3 following H<sub>2</sub> being bubbled into the reaction for 5 h in the presence of Cu<sub>2</sub>O/Pd 9% materials at a catalyst loading of 2 mg/mL while in the dark and (b) the aerosolization of biphenyl following H<sub>2</sub> being bubbled into the reaction for 5 h in the absence of a photocatalyst while in the dark. Note that lines are added to guide the eye.

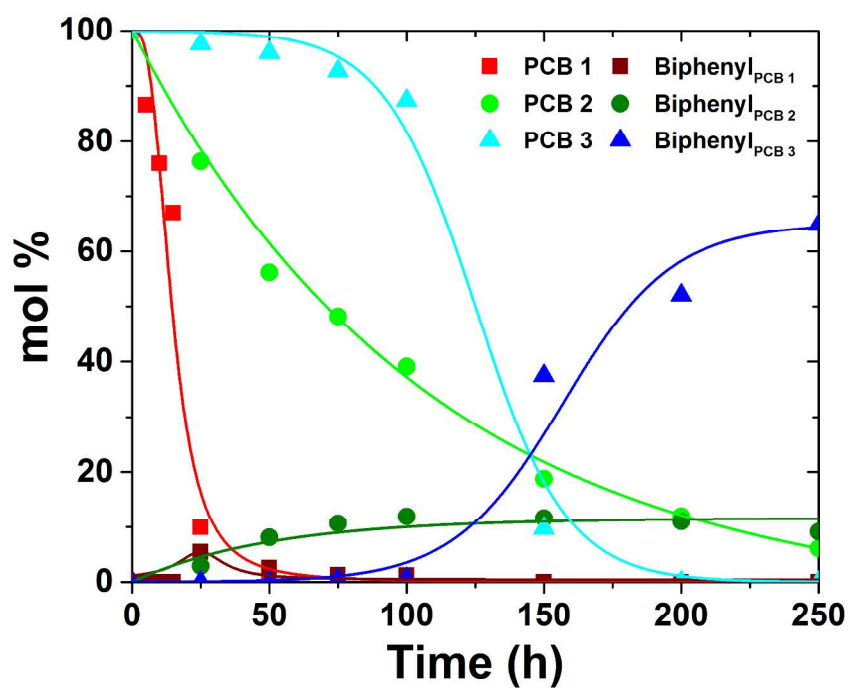

**Figure S3** The overall reaction analysis for the photodegradation of PCBs 1, 2, and 3 following light irradiation for 250 h in the absence of a photocatalyst. Note that lines are added to guide the eye.

**Table S3. Pseudo-first-order rate constants for the PCB 3 photodechlorination reaction using the Cu<sub>2</sub>O/Pd 9% materials at the indicated catalyst loadings**

| <b>Cu<sub>2</sub>O/Pd 9%</b>                                                   | <b>1 mg/mL</b> | <b>2 mg/mL</b> | <b>3 mg/mL</b> |
|--------------------------------------------------------------------------------|----------------|----------------|----------------|
| <b><math>k_{\text{PCB 3}}</math><br/>(<math>10^{-3} \text{ h}^{-1}</math>)</b> | $17.6 \pm 0.7$ | $50.8 \pm 2.9$ | $9.9 \pm 0.9$  |

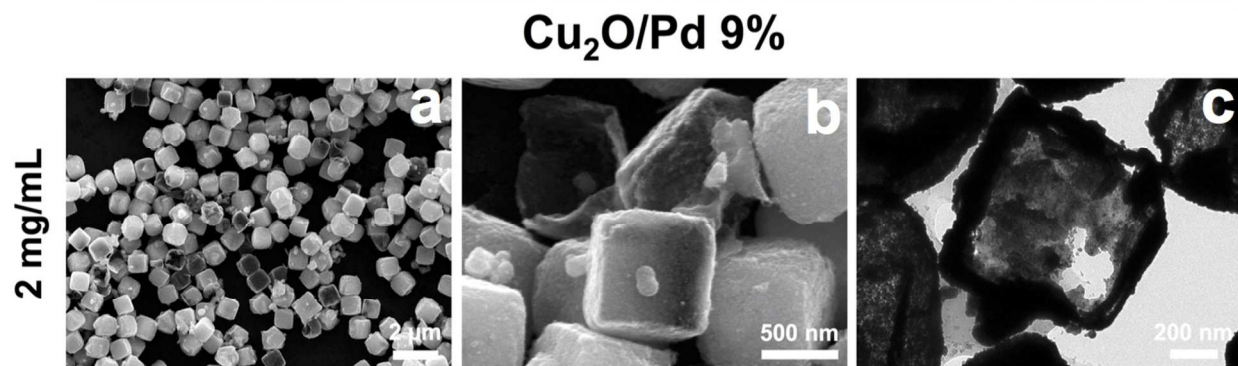

**Figure S4.** Additional SEM and TEM images of the Cu<sub>2</sub>O/Pd 9% cubes presented for the post-dechlorination analysis. Parts (a-b) present SEM images and part (c) displays a TEM image when a catalyst loading of 2 mg/mL was used in the reaction.



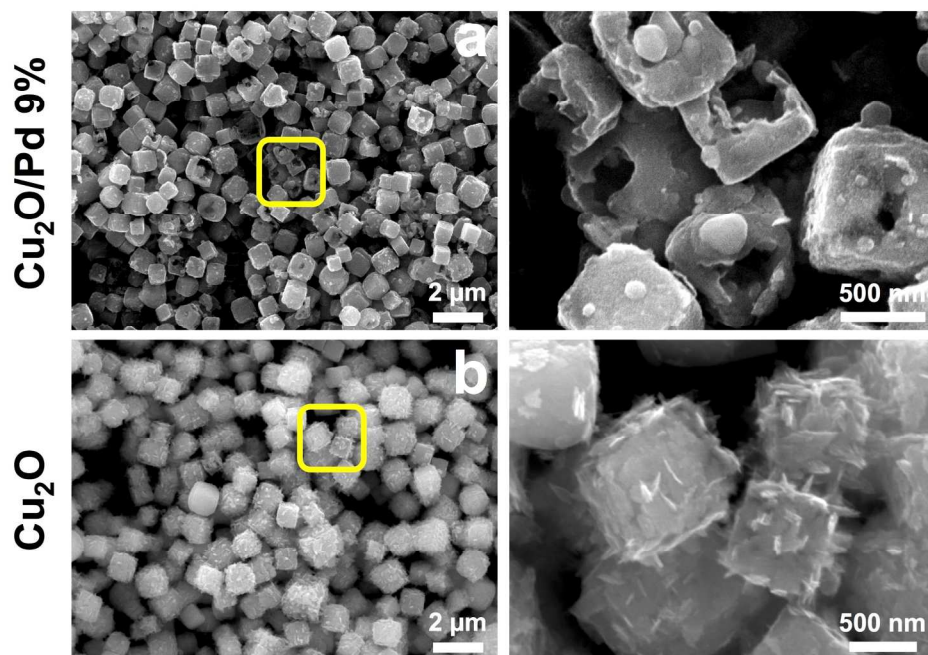

**Figure S5.** SEM images of (a) the Cu<sub>2</sub>O/Pd 9% materials and (b) the bare Cu<sub>2</sub>O cubes after being photoirradiated in ethanol/water for 250 h in the absence of PCB. The right panel shows the yellow box zoomed-in.

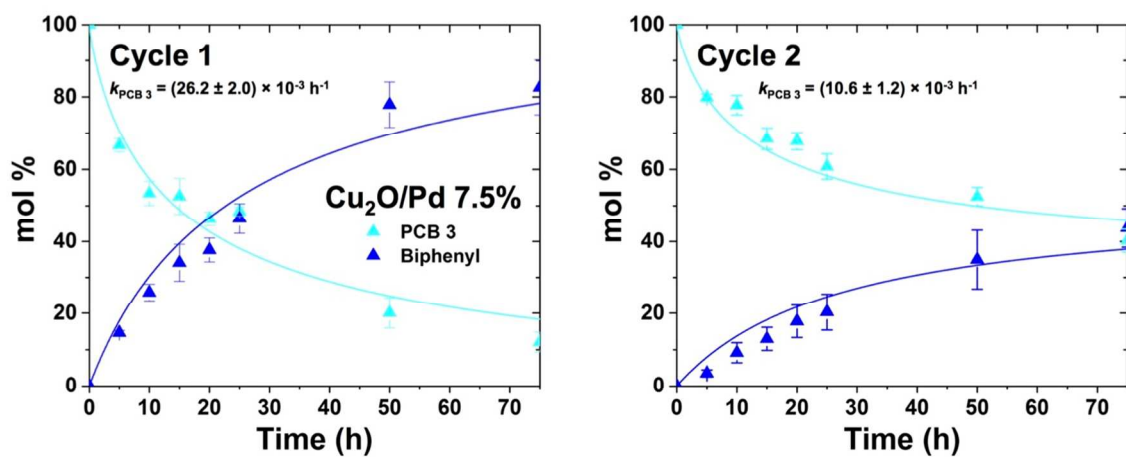

**Figure S6.** The reaction analysis for the recyclability study of the Cu<sub>2</sub>O/Pd 7.5% materials for the photodegradation of PCB 3 at a catalyst loading of 2 mg/mL. Note that lines are added to guide the eye.
